# Supplementary material for: Asymmetric Push–Pull Type Co(II) Porphyrin for Enhanced Electrocatalytic CO2 Reduction Activity
Source: MDPI journal article supplement (doi:10.3390/molecules28010150), 2022-12-24
Supplement: s1 [file s1]

# Supplementary Materials

FOR

## Asymmetric Push–Pull Type Co(II) Porphyrin for Enhanced Electrocatalytic CO<sub>2</sub> Reduction Activity

Chenjiao Huang <sup>1</sup>, Wenwen Bao <sup>1</sup>, Senhe Huang <sup>2</sup>, Bin Wang <sup>1</sup>, Chenchen Wang <sup>1</sup>, Sheng Han <sup>1,\*</sup>, Chenbao Lu <sup>2,\*</sup> and Feng Qiu <sup>1,\*</sup>

<sup>1</sup> School of Chemical and Environmental Engineering, Shanghai Institute of Technology, 100 Haiquan Road, Shanghai 201418, China

<sup>2</sup> The Meso-Entropy Matter Lab, State Key Laboratory of Metal Matrix Composites, Frontiers Science Center for Transformative Molecules, School of Chemistry and Chemical Engineering, Shanghai Jiao Tong University, 800 Dongchuan Road, Shanghai 200240, China

\* Correspondence: hansheng654321@sina.com (S.H.); castle@sjtu.edu.cn (C.L.); fengqiu@sit.edu.cn (F.Q.)

## 1. Electrochemical measurements

The electrocatalytic CO<sub>2</sub> reduction was performed in a three electrode H-type cell, of which Ag/AgCl as the reference electrode, Pt plate as the counter electrode, and catalysts loaded on carbon paper as the working electrode. All potentials reported in this work were versus to reversible hydrogen electrode (RHE) using the following formula:

$$E_{\text{RHE}} (\text{V}) = E_{\text{Ag/AgCl}} (\text{V}) + 0.197 \text{ V} + 0.0591 \text{ V} \times \text{pH}$$

The electrolyte was CO<sub>2</sub> saturated 0.5 M KHCO<sub>3</sub>, and CO<sub>2</sub> (Air Liquid, Ltd.) was continuously supplied to the cell (20 mL min<sup>-1</sup>) through a gas bubbling tube during the constant potential electrolysis. The LSV curves were obtained with a scan rate of 5 mV s<sup>-1</sup>, all potentials in this study were without *iR* compensated. The electrochemical double-layer capacitances (*C<sub>dl</sub>*) of catalysts were calculated from CV curves. The CV curves were performed at scan rates varying from 10 to 70 mV s<sup>-1</sup> in the region from -0.26 to -0.16 V. The capacitive currents of  $\Delta J$  (*J<sub>anodic</sub>* – *J<sub>cathodic</sub>*) are plotted as a function of the CV against the scan rate. The slope of the fitting line is equal to twice the *C<sub>dl</sub>*, which is linearly proportional to the electrochemically effective surface area of the electrode. The gaseous products were monitored by an online gas chromatography (GC, Shimadzu GC-2014C), equipped with a thermal conductivity detector (TCD) detector for H<sub>2</sub> and a flame ionization detector (FID) detector for CO quantification. A GC run repeats every 18 minutes. The GC was calibrated with standard gas mixtures (Air Liquide, CO, H<sub>2</sub>, CH<sub>4</sub>, C<sub>2</sub>H<sub>4</sub>, C<sub>2</sub>H<sub>6</sub>, C<sub>2</sub>H<sub>2</sub> in N<sub>2</sub>) before the product measurements. The liquid products in the KHCO<sub>3</sub> solution were analyzed and quantified through a Bruker 500 MHz (AVANCE III) NMR spectroscope with water suppression. After electrolysis, KHCO<sub>3</sub> electrolyte (0.5 mL) was collected and mixed with D<sub>2</sub>O (0.1 mL) in an NMR tube and dimethyl sulfoxide (DMSO, 0.05  $\mu$ L) as an internal standard.

### Faradic efficiency (FE) calculation:

Faradaic Efficiency (FE) of CO and H<sub>2</sub> were calculated via the following

equation:

$$FE = \frac{Q_i}{Q_{total}} = \frac{2 \times P_0 \times F \times v \times v_i}{R \times T \times I}$$

where  $Q_i$  is the quantity of electric charge needed to produce corresponding product  $i$ .  $Q_{total}$  is the quantity of electric charge needed to produce all products. 2 is the number of electrons transferred per mole  $CO_2$  to CO or per mole  $H_2O$  to  $H_2$ .  $P_0$  is atmospheric pressure ( $1.01 \times 10^5$  Pa),  $F$  is the faradaic constant ( $96485$  C mol<sup>-1</sup>),  $v$  is the gas flow rate measured by flow meter,  $v_i$  is the volume concentration of gas product in the exhaust gas from the cell determined by online GC.  $T$  is the reaction temperature (298.15 K),  $R$  is the idea gas constant ( $8.314$  J mol<sup>-1</sup> K<sup>-1</sup>), and  $I$  is the current at each potential.

### Evaluation of turnover frequency (TOF) (h<sup>-1</sup>):

The TOF (h<sup>-1</sup>) of product CO was evaluated as follows:

$$TOF = \frac{FE_{CO} \times j_{total} \times A \times M_{Co} \times t}{n \times F \times \omega_{Co} \times m}$$

where  $FE$  is the faradaic efficiency of CO,  $j$  is the total current density,  $A$  (1 cm<sup>2</sup>) is the electrode geometric area,  $\omega_{Co}$  is the mass fraction of cobalt on the catalyst,  $m$  is the mass of catalyst coated on working electrode, and  $M_{Co}$  is the atomic mass of Co (59 g mol<sup>-1</sup>).  $F$  is the faradaic constant ( $96485$  C mol<sup>-1</sup>),  $t$  is the reaction time (1 h/3600 s),  $n$  is the number of electrons transferred for product formation, which is 2 for CO.

### DFT calculation

Electronic properties (HOMO-LUMO) of porphyrin molecules were performed using the Gaussian 09 program. A PBE0 functional with D3 correction (Becke–Johnson damping) was adopted for its robustness and dispersion corrections, which make it widely accepted as the proper functional to study the reactions of transition metal complexes. The Stuttgart–Dresden pseudopotential and double- $\xi$  valence basis set were used for transition metal atoms (cobalt). For all other main group elements (H, C, N, O), the all-electron 6–31G\* basis set was used. The geometric structures of all species were fully

optimized.

The free energy calculations were performed using the Vienna *ab initio* simulation package (VASP) with the projector-augmented wave (PAW) method. All calculations were based on the same generalized gradient approximation (GGA) method with Perdew-Burke-Ernzerhof (PBE) functional for the exchange-correlation term. The plane wave cutoff was set to 400 eV. The Brillouin zone integration was carried out with 1×1×1 Monkhorst-Pack *k*-point grid. The cells of molecules were built with vacuum slab height of 10 Å along x, y and z direction. The convergence of energy and forces were set to 5×10<sup>-7</sup> eV and 0.001 eV Å<sup>-1</sup> for structure optimization, respectively.

The CRR pathway with CO production can be summarized as follows:

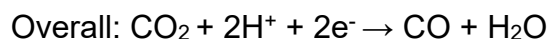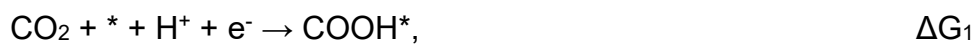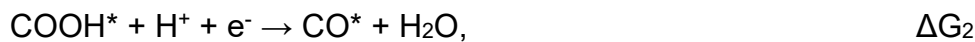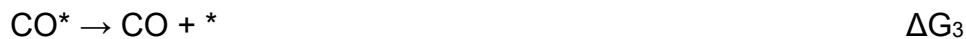

The free energy of the adsorption of intermediates including COOH\* and CO\* was calculated by:  $G = E^{DFT} + ZPE - T\Delta S$ , where  $E^{DFT}$  is the DFT-optimized total energy,  $ZPE$  is the zero-point vibrational energy,  $T$  is the temperature, and  $\Delta S$  is the entropy). The zero-point energies and entropies of the reaction species were calculated from the vibrational frequencies.

## 2. Figures

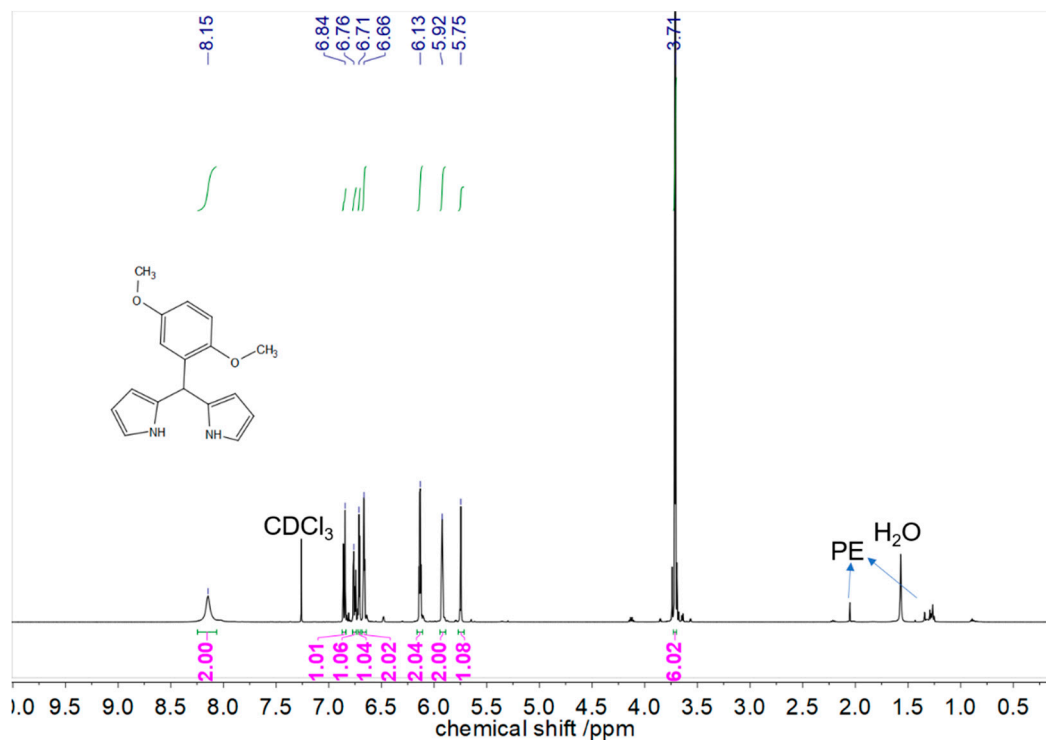

**Figure S1.**  $^1\text{H}$  NMR spectrum of DpmPM.

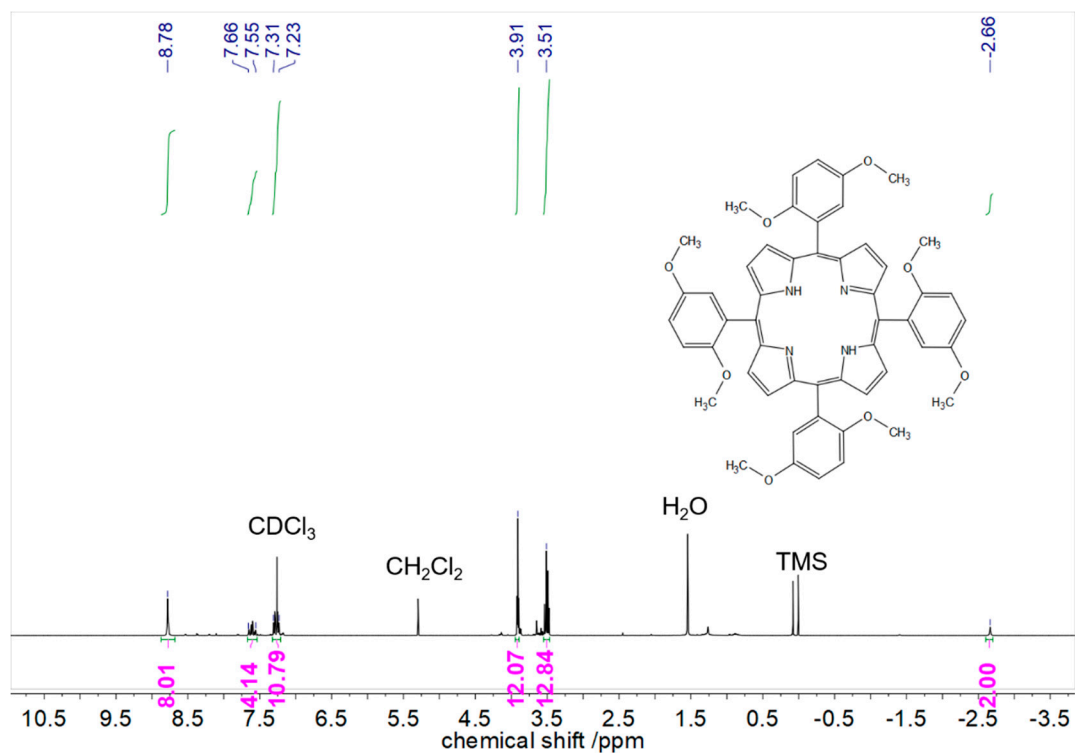

**Figure S2.**  $^1\text{H}$  NMR spectrum of cs-Por-OMe.

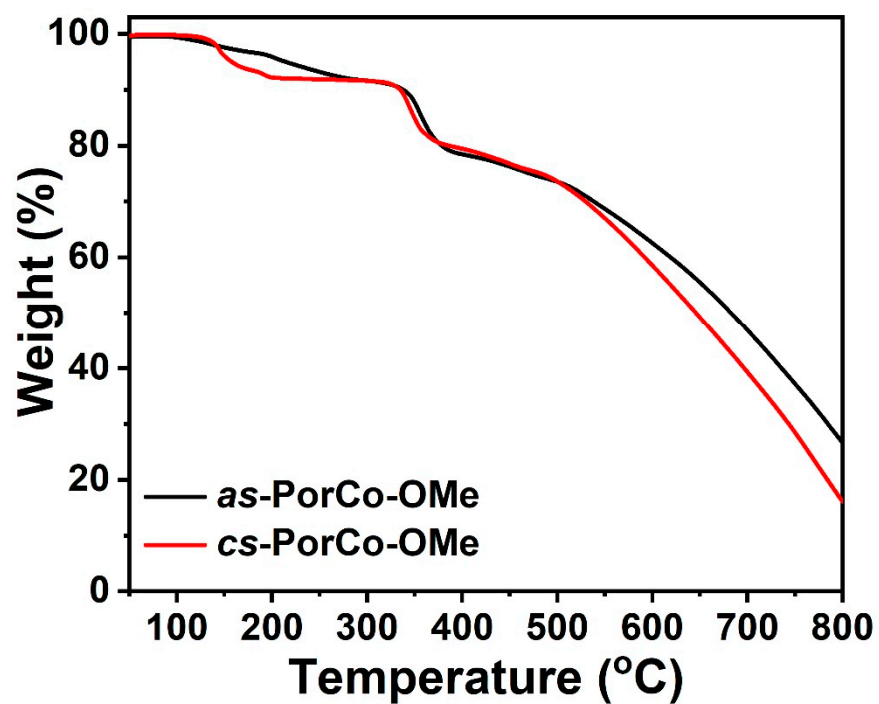

**Figure S3.** TGA cruves of *as*-PorCo-OMe and *cs*-PorCo-OMe

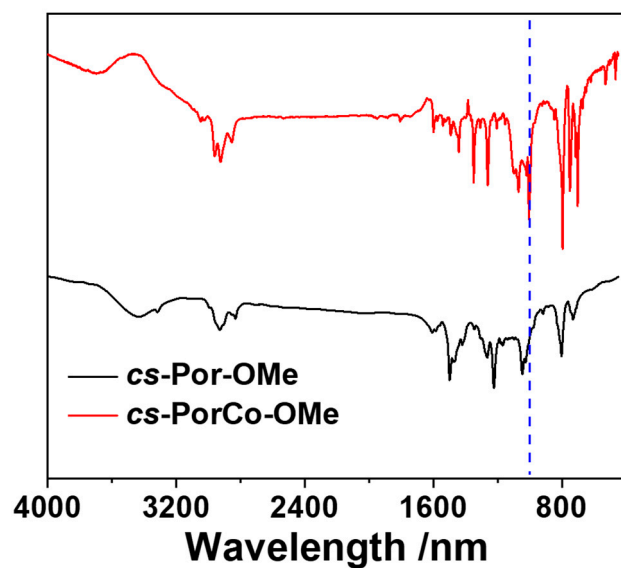

**Figure S4.** a) FTIR spectra of *cs*-PorCo-OMe and *cs*-Por-OMe

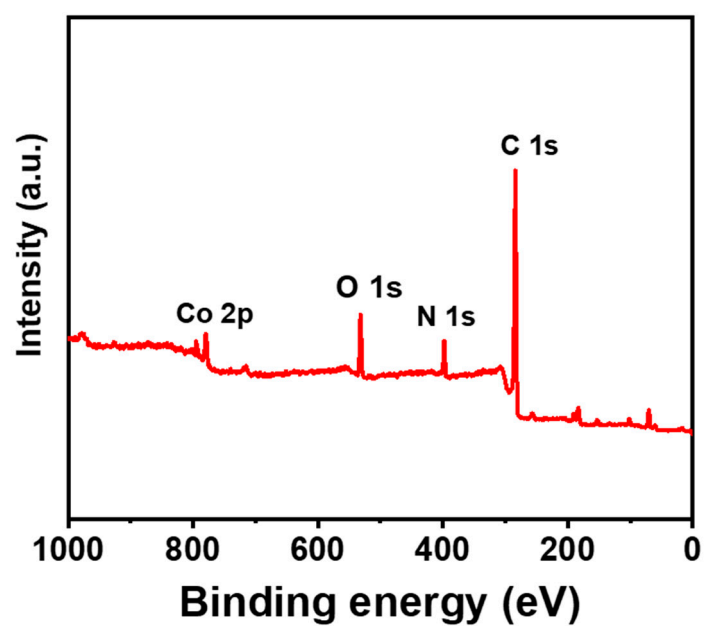

**Figure S5.** XPS spectra of as-PorCo-OMe

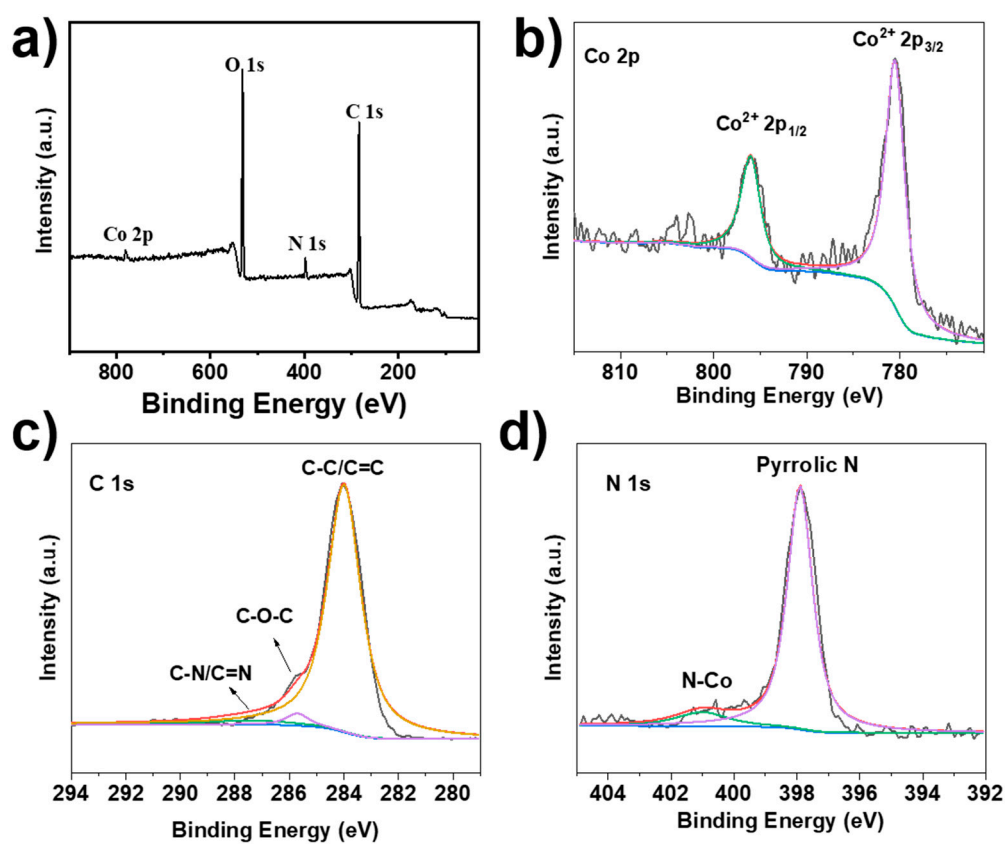

**Figure S6.** (a) XPS spectra of cs-PorCo-OMe; High resolution Co 2p (b), N 1s (c) and C 1s (d) XPS spectra in cs-PorCo-OMe

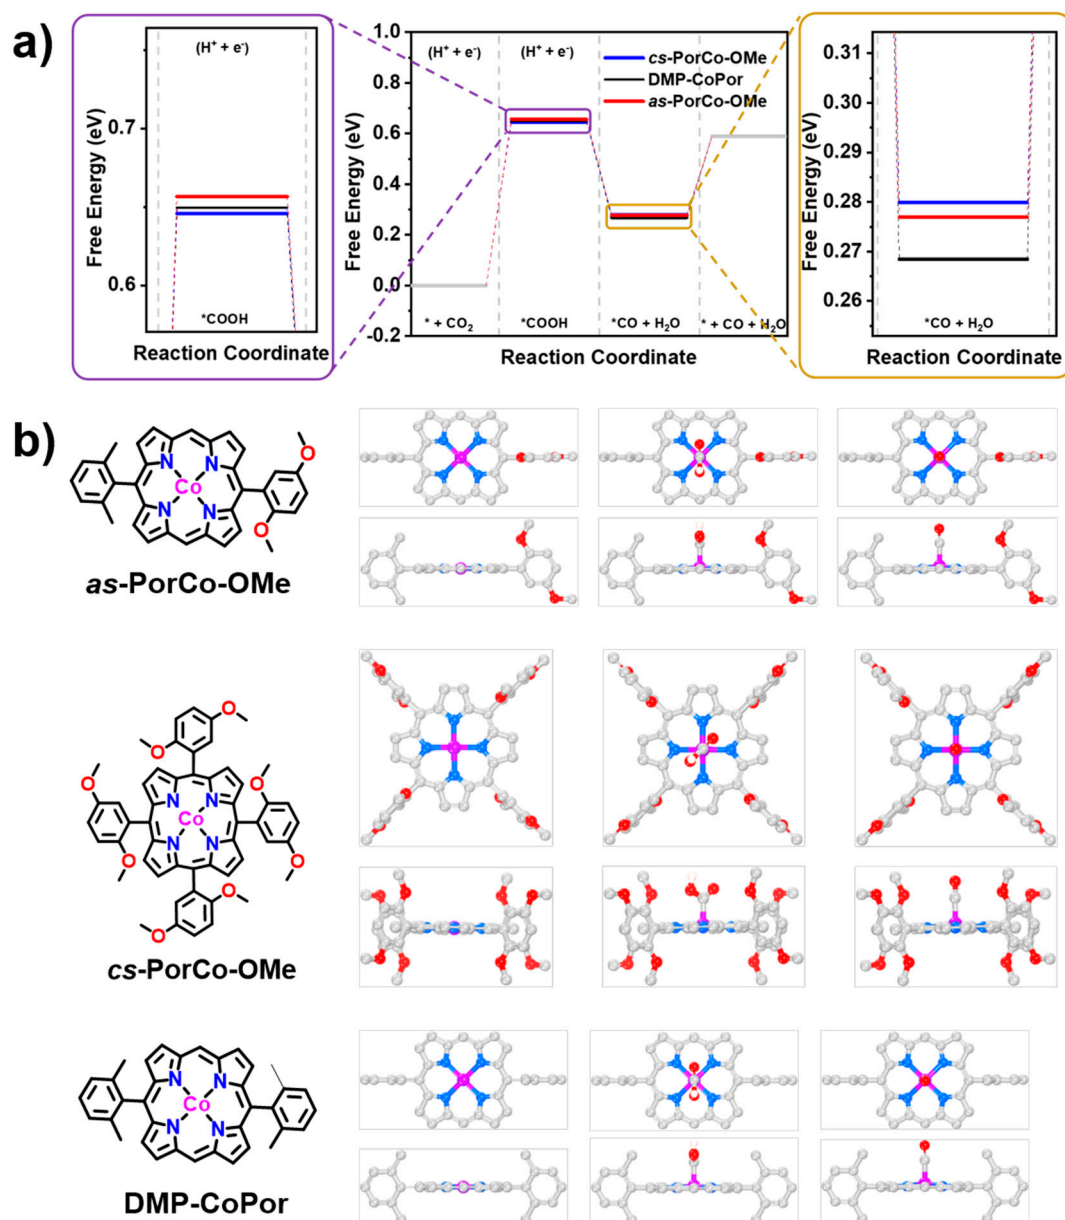

**Figure S7.** a) Free energy of as-PorCo-OMe and cs-PorCo-OMe in different CO<sub>2</sub>RR steps; b) Schematic of the reaction steps of CO<sub>2</sub> reduction to CO on as-PorCo-OMe, cs-PorCo-OMe, and DMP-CoPor.

As shown in Figure S7a, the free energy path of the conversion of CO<sub>2</sub> to \*COOH ( $\Delta^*G_{COOH}$ ) are similar for as-PorCo-OMe, cs-PorCo-OMe, and DMP-CoPor, in which cs-PorCo-OMe has the lowest Gibbs free energy and the free energy gap between second step and third step for as-PorCo-OMe (0.379 eV) also is lower than that of DMP-CoPor (0.381 eV). These results suggest that the methoxy-substitution could provide the electron donor effect on the electrocatalytic activity.



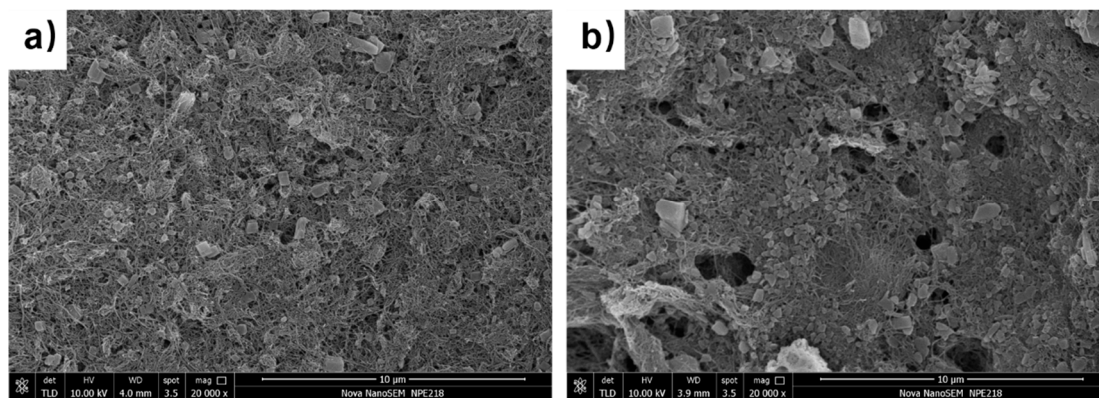

**Figure S8.** SEM images of as-PorCo-OMe (a) and cs-PorCo-OMe (b) with CNTs

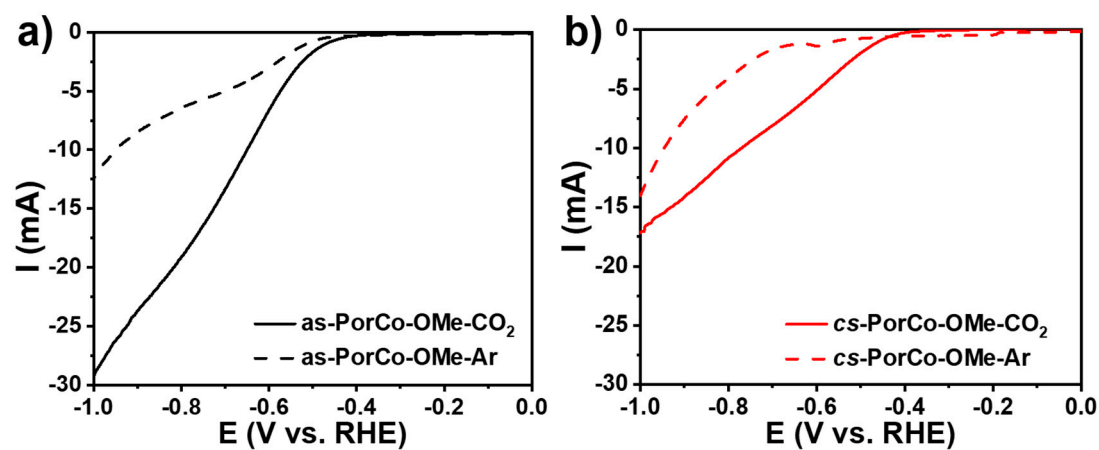

**Figure S9.** LSV curves in  $\text{CO}_2$ -saturated and Ar-saturated 0.5 M  $\text{KHCO}_3$  electrolyte for as-PorCo-OMe (a) and cs-PorCo-OMe (b).

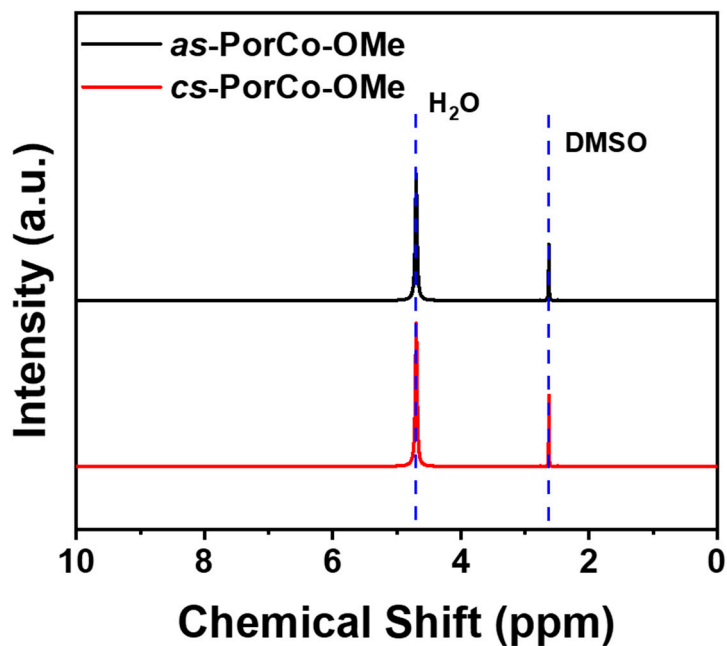

**Figure S10.**  $^1\text{H}$  NMR spectra of products from electrocatalyst of as-PorCo-OMe (a) and cs-PorCo-OMe (b) at  $-0.7$  V vs. RHE.

Except the water and solvent signal, no additional signal is detected, indicating that no liquid products formed during  $\text{CO}_2\text{RR}$ .

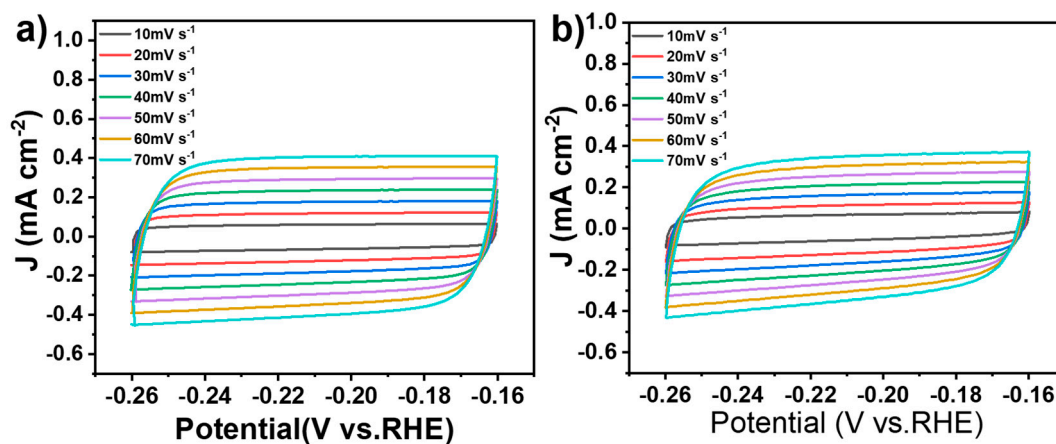

**Figure S11.** Cyclic voltammetry measurements were performed at scan rates varying from  $10$  to  $70$   $\text{mV s}^{-1}$  for as-PorCo-OMe (a) and cs-PorCo-OMe (b) .

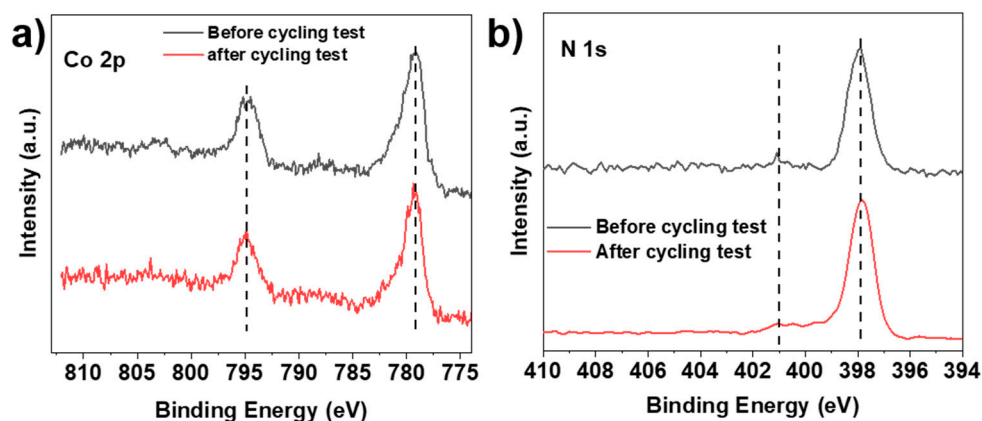

**Figure S12.** Co 2p (a), and N 1s (b) XPS spectra in as-PorCo-OMe before and after cycling test.

**Table S1.** Comparison of CO<sub>2</sub>RR performance with reported electrocatalysts.

| Catalysts          | Electrolyte             | j/mA<br>cm <sup>-2</sup> | Potential (V<br>vs. RHE) | FE <sub>co</sub> | TOF (h <sup>-1</sup> ) | Ref.      |
|--------------------|-------------------------|--------------------------|--------------------------|------------------|------------------------|-----------|
| as-PorCo-OMe       | 0.5 M KHCO <sub>3</sub> | -13.4                    | -0.7                     | 94.7%            | 2880                   | This work |
| cs-PorCo-OMe       |                         | -6.30                    |                          | 84.5%            | 2329                   |           |
| CoTMPP             | 0.5 M KHCO <sub>3</sub> | -0.46                    | -0.6                     | 94.1%            | ~720                   | S1        |
| as-PorCo           | 0.5 M KHCO <sub>3</sub> | -6.25                    | -0.6                     | 93%              | 2968                   | S2        |
| DMP-CoPor          | 0.5 M KHCO <sub>3</sub> | -4.4                     | -0.7                     | 85.5%            | 1918                   | S3        |
| Co proto-porphyrin | 0.1 M HClO <sub>4</sub> | -0.33                    | -0.7                     | 40%              | 2880                   | S4        |
| PorCo/cationic POP | 0.5 M KHCO <sub>3</sub> | ~4.2                     | -0.6                     | 83%              | 5040                   | S5        |
| COF-367-PorCo(1%)  | 0.5 M KHCO <sub>3</sub> | -0.4                     | -0.55                    | 90%              | 764                    | S6        |
| PorCo-MOF          | 0.1 M KHCO <sub>3</sub> | -1                       | -0.6                     | 76%              | 200                    | S7        |
| PorFe-MOF          | 0.5 M KHCO <sub>3</sub> | -1.2                     | -0.5                     | 91%              | 1209                   | S8        |
| PorNi-CTF          | 0.5 M KHCO <sub>3</sub> | - 52.9                   | -0.9                     | 97%              | 1692                   | S9        |

#### 4. Reference

- S1.** Zhu, M.; Yang, D.-T.; Ye, R.; Zeng, J.; Corbin, N.; Manthiram, K., Inductive and electrostatic effects on cobalt porphyrins for heterogeneous electrocatalytic carbon dioxide reduction. *Catal. Sci. Technol.* **2019**, *9*, 974-980.
- S2.** Bao, W.; Huang, S.; Tranca, D.; Feng, B.; Qiu, F.; Rodríguez-Hernández, F.; Ke, C.; Han, S.; Zhuang, X., Molecular Engineering of Co<sup>II</sup> Porphyrins with Asymmetric Architecture for Improved Electrochemical CO<sub>2</sub> Reduction. *ChemSusChem* **2022**, *15*, e202200090.
- S3.** Xuan, X.; Jiang, K.; Huang, S.; Feng, B.; Qiu, F.; Han, S.; Zhu, J.; Zhuang, X., Tertiary amine-functionalized Co(II) porphyrin to enhance the electrochemical CO<sub>2</sub> reduction activity. *J. Mater. Sci.* **2022**, *57*, 10129-10140.
- S4.** Shen, J.; Kortlever, R.; Kas, R.; Birdja, Y. Y.; Diaz-Morales, O.; Kwon, Y.; Ledezma-Yanez, I.; Schouten, K. J. P.; Mul, G.; Koper, M. T. M., Electrocatalytic reduction of carbon dioxide to carbon monoxide and methane at an immobilized cobalt protoporphyrin. *Nat. Commun.* **2015**, *6*, 8177.
- S5.** Tang, J.-K.; Zhu, C.-Y.; Jiang, T.-W.; Wei, L.; Wang, H.; Yu, K.; Yang, C.-L.; Zhang, Y.-B.; Chen, C.; Li, Z.-T.; Zhang, D.-W.; Zhang, L.-M., Anion exchange-induced single-molecule dispersion of cobalt porphyrins in a cationic porous organic polymer for enhanced electrochemical CO<sub>2</sub> reduction via secondary-coordination sphere interactions. *J. Mater. Chem. A* **2020**, *8*, 18677-18686.
- S6.** Lin, S.; Diercks, C. S.; Zhang, Y.-B.; Kornienko, N.; Nichols, E. M.; Zhao, Y.; Paris, A. R.; Kim, D.; Yang, P.; Yaghi, O. M.; Chang, C. J., Covalent organic frameworks comprising cobalt porphyrins for catalytic CO<sub>2</sub> reduction in water. *Science* **2015**, *349*, 1208-1213.
- S7.** Kornienko, N.; Zhao, Y.; Kley, C. S.; Zhu, C.; Kim, D.; Lin, S.; Chang, C. J.; Yaghi, O. M.; Yang, P., Metal–Organic Frameworks for Electrocatalytic Reduction of Carbon Dioxide. *J. Am. Chem. Soc.* **2015**, *137*, 14129-14135.
- S8.** Dong, B.-X.; Qian, S.-L.; Bu, F.-Y.; Wu, Y.-C.; Feng, L.-G.; Teng, Y.-L.; Liu, W.-L.; Li, Z.-W., Electrochemical Reduction of CO<sub>2</sub> to CO by a Heterogeneous Catalyst of Fe–

Porphyrin-Based Metal–Organic Framework. *ACS Appl. Energy Mater.* **2018**, *1*, 4662-4669.

**S9.** Lu, C.; Yang, J.; Wei, S.; Bi, S.; Xia, Y.; Chen, M.; Hou, Y.; Qiu, M.; Yuan, C.; Su, Y.; Zhang, F.; Liang, H.; Zhuang, X., Atomic Ni Anchored Covalent Triazine Framework as High Efficient Electrocatalyst for Carbon Dioxide Conversion. *Adv. Funct. Mater.* **2019**, *29*, 1806884.
